# Supplementary material for: Prevalence of Neutralizing Antibodies to Canine Distemper Virus and Response to Vaccination in Client-Owned Adult Healthy Dogs
Source: MDPI journal article supplement (doi:10.3390/v13050945), 2021-05-20
Supplement: s1 [file s1]

Supplementary

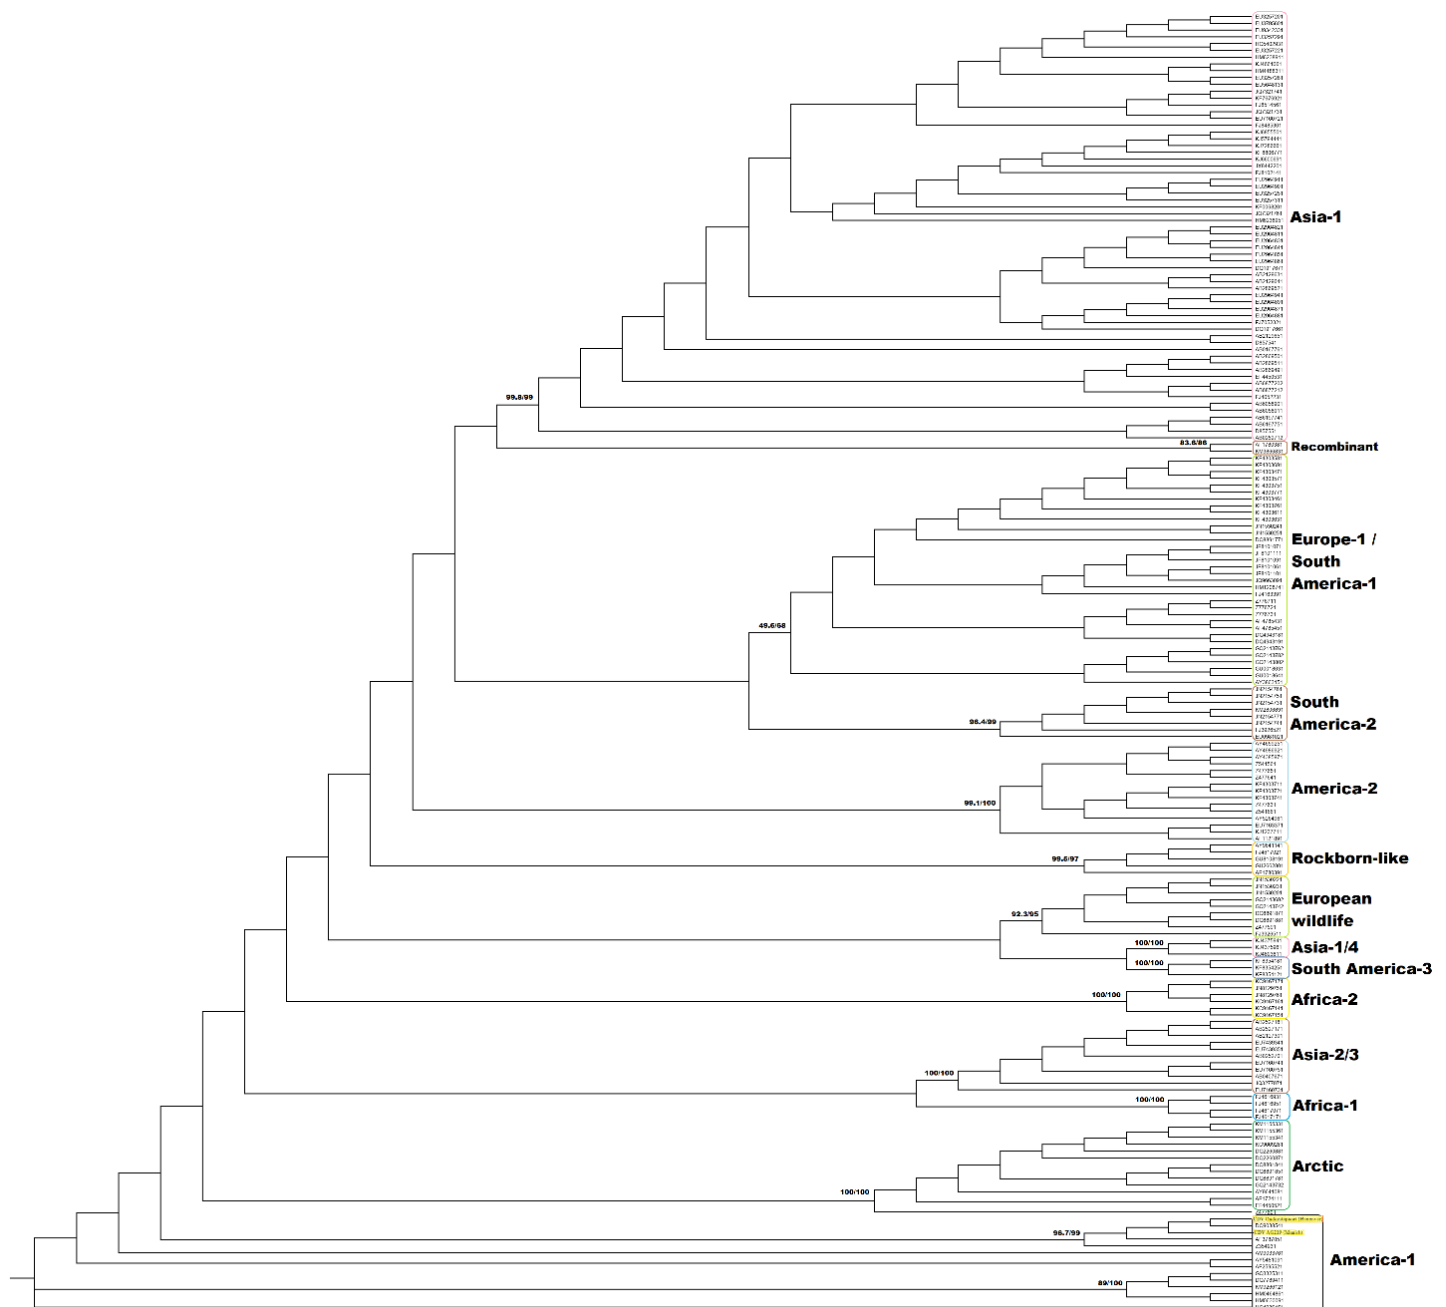

**Figure 1.** Phylogenetic position of test sequences (shaded yellow) among the clades of different lineages. Cluster of strains in each clade are color-bordered and denoted on the right. Clade credibility support values are denoted as bootstrap/posterior probability at key nodes.

**Table S1.** Anti-canine distemper antibody titers in virus neutralization using isolate AG219 in 97 dogs.

| Dogs | Antibody Titer Against CDV on Day 0 (Before Vaccination) | Antibody Titer Against CDV on Day 7 (After Vaccination) | Antibody Titer Against CDV on Day 28 (After Vaccination) |
|------|----------------------------------------------------------|---------------------------------------------------------|----------------------------------------------------------|
| 1    | 160                                                      | 320                                                     | 160                                                      |
| 2    | 40                                                       | 40                                                      | 40                                                       |
| 3    | <10                                                      | <10                                                     | <10                                                      |
| 4    | 40                                                       | 40                                                      | 40                                                       |

|    |     |     |     |
|----|-----|-----|-----|
| 5  | 80  | 80  | 80  |
| 6  | 80  | 160 | 80  |
| 7  | 40  | 40  | 40  |
| 8  | 40  | 20  | 40  |
| 9  | 40  | 40  | 40  |
| 10 | 40  | 40  | 20  |
| 11 | 80  | 80  | 160 |
| 12 | 20  | 40  | 40  |
| 13 | 160 | 80  | 80  |
| 14 | 160 | 80  | 160 |
| 15 | 40  | 80  | 80  |
| 16 | 40  | 80  | 80  |
| 17 | 80  | 80  | 80  |
| 18 | 160 | 160 | 160 |
| 19 | 80  | 160 | 160 |
| 20 | 40  | 80  | 80  |
| 21 | 160 | 320 | 320 |
| 22 | 320 | 320 | 160 |
| 23 | 160 | 160 | 160 |
| 24 | 160 | 160 | 80  |
| 25 | 40  | 40  | 40  |
| 26 | 160 | 320 | 320 |
| 27 | 20  | 20  | 40  |
| 28 | 40  | 80  | 80  |
| 29 | 40  | 80  | 80  |
| 30 | 40  | 40  | 40  |
| 31 | 40  | 40  | 40  |
| 32 | 40  | 20  | 20  |
| 33 | 20  | 40  | 40  |
| 34 | 320 | 320 | 320 |
| 35 | 160 | 160 | 160 |
| 36 | 20  | 40  | 20  |
| 37 | 80  | 160 | 80  |
| 38 | 80  | 80  | 40  |
| 39 | 20  | 20  | 80  |
| 40 | 160 | 160 | 80  |
| 41 | 40  | 40  | 80  |
| 42 | 20  | 20  | 20  |
| 43 | 640 | 640 | 320 |
| 44 | 20  | 20  | 20  |
| 45 | 320 | 640 | 640 |
| 46 | 320 | 320 | 320 |
| 47 | 80  | 40  | 80  |
| 48 | 160 | 320 | 320 |
| 49 | 80  | 40  | 40  |
| 50 | 320 | 320 | 640 |
| 51 | 640 | 640 | 640 |
| 52 | <10 | <10 | <10 |
| 53 | 10  | 20  | 20  |

|    |     |     |     |
|----|-----|-----|-----|
| 54 | 160 | 80  | 160 |
| 55 | 80  | 80  | 160 |
| 56 | 160 | 160 | 80  |
| 57 | <10 | <10 | <10 |
| 58 | 320 | 320 | 320 |
| 59 | <10 | <10 | <10 |
| 60 | 640 | 640 | 640 |
| 61 | 80  | 80  | 160 |
| 62 | 80  | 160 | 80  |
| 63 | 80  | 160 | 80  |
| 64 | 80  | 160 | 160 |
| 65 | 320 | 320 | 160 |
| 66 | 40  | 40  | 40  |
| 67 | 320 | 640 | 320 |
| 68 | 80  | 80  | 80  |
| 69 | 80  | 80  | 160 |
| 70 | 20  | 20  | 20  |
| 71 | 160 | 160 | 160 |
| 72 | 640 | 320 | 640 |
| 73 | 40  | 80  | 40  |
| 74 | 40  | 40  | 40  |
| 75 | 20  | 40  | 40  |
| 76 | 80  | 80  | 80  |
| 77 | 10  | 10  | 10  |
| 78 | 40  | 40  | 40  |
| 79 | 40  | 20  | 20  |
| 80 | 40  | 40  | 40  |
| 81 | 40  | 20  | 40  |
| 82 | 20  | 20  | 20  |
| 83 | 20  | 40  | 20  |
| 84 | 40  | 40  | 20  |
| 85 | 20  | 10  | 10  |
| 86 | 80  | 40  | 40  |
| 87 | 20  | 40  | 20  |
| 88 | 80  | 160 | 160 |
| 89 | 20  | 20  | 10  |
| 90 | <10 | <10 | <10 |
| 91 | 20  | 20  | 20  |
| 92 | 40  | 20  | 40  |
| 93 | 160 | 80  | 80  |
| 94 | 20  | 20  | 20  |
| 95 | 80  | 80  | 80  |
| 96 | 20  | 20  | 40  |
| 97 | 40  | 40  | 80  |
